# Supplementary material for: Potentially Bio-Accessible Metabolites from an Extract of Cornus mas Fruit after Gastrointestinal Digestion In Vitro and Gut Microbiota Ex Vivo Treatment
Source: MDPI journal article supplement (doi:10.3390/nu14112287), 2022-05-30
Supplement: s1 [file s1]

Supplementary Materials

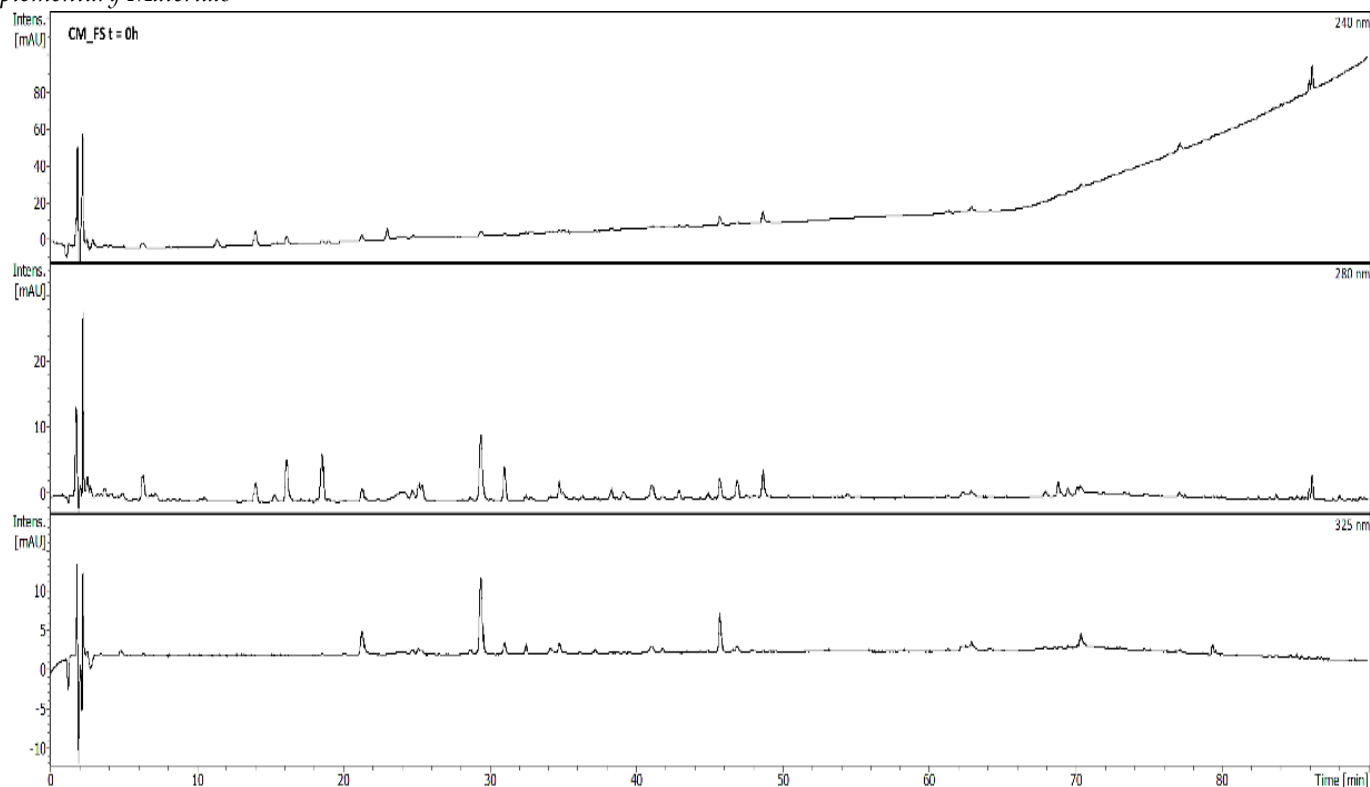

**Figure S1.** HPLC chromatograms of ethanolic-aqueous extract from fruits of *C. mas* treated with FS in  $t = 0$  h registered at 240, 280, and 325 nm.

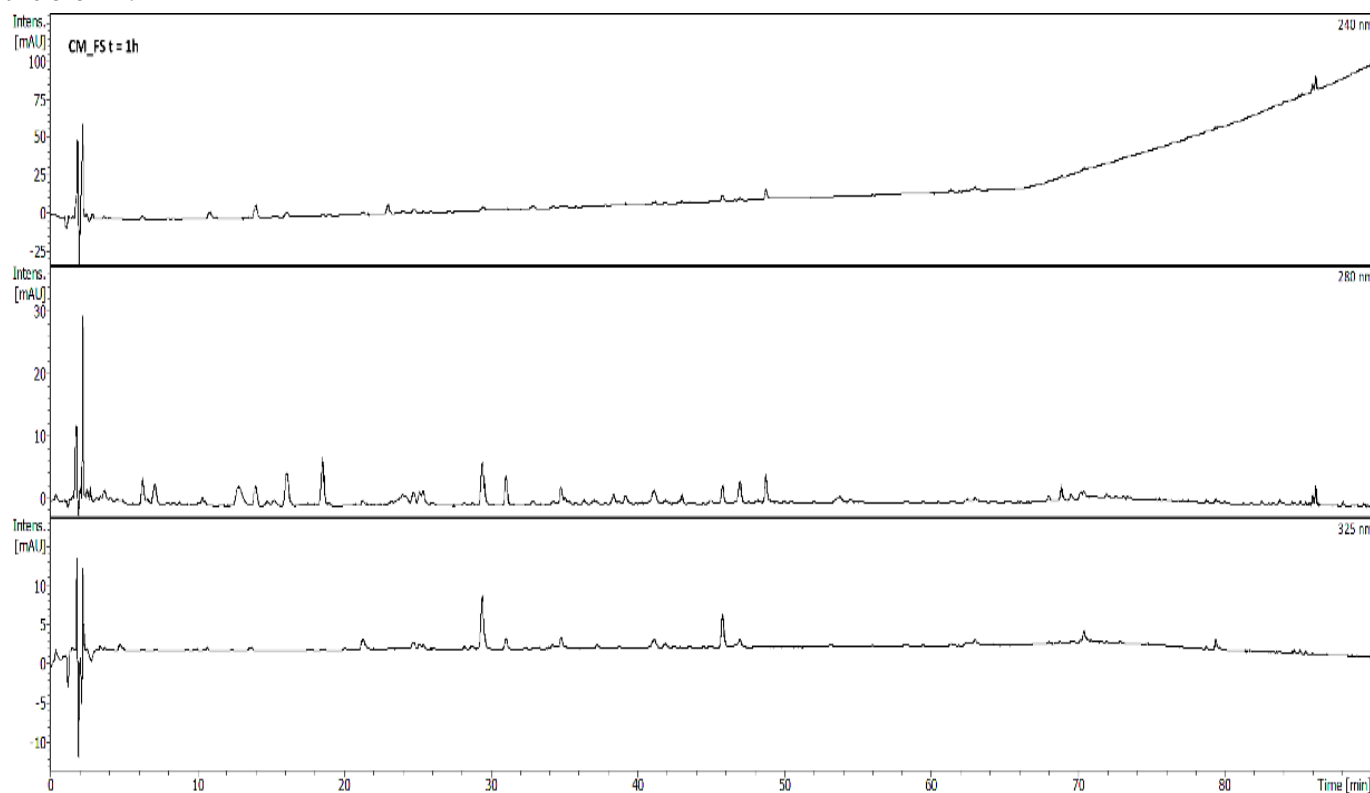

**Figure S2.** HPLC chromatograms of ethanolic-aqueous extract from fruits of *C. mas* treated with FS in  $t = 1$  h registered at 240, 280, and 325 nm.

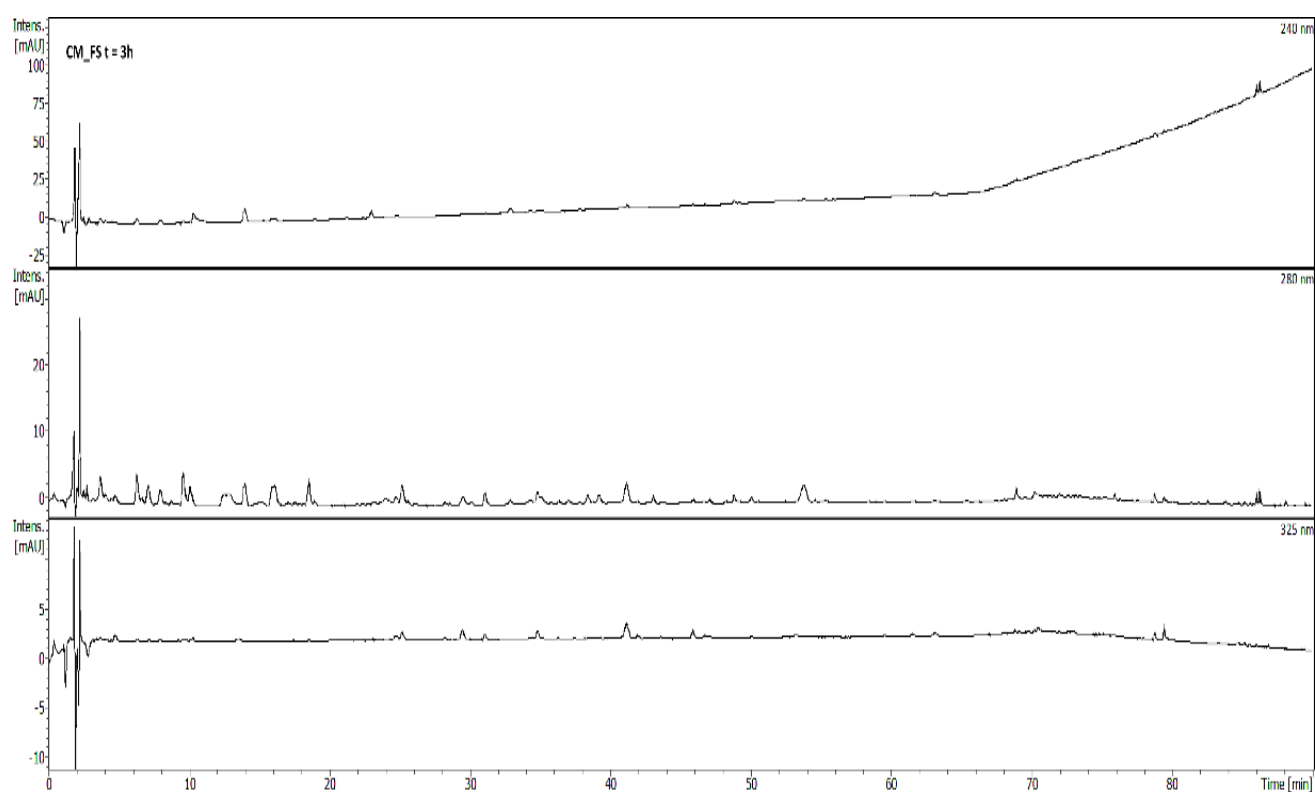

**Figure S3.** HPLC chromatograms of ethanolic-aqueous extract from fruits of *C. mas* treated with FS in  $t = 3$  h registered at 240, 280, and 325 nm.

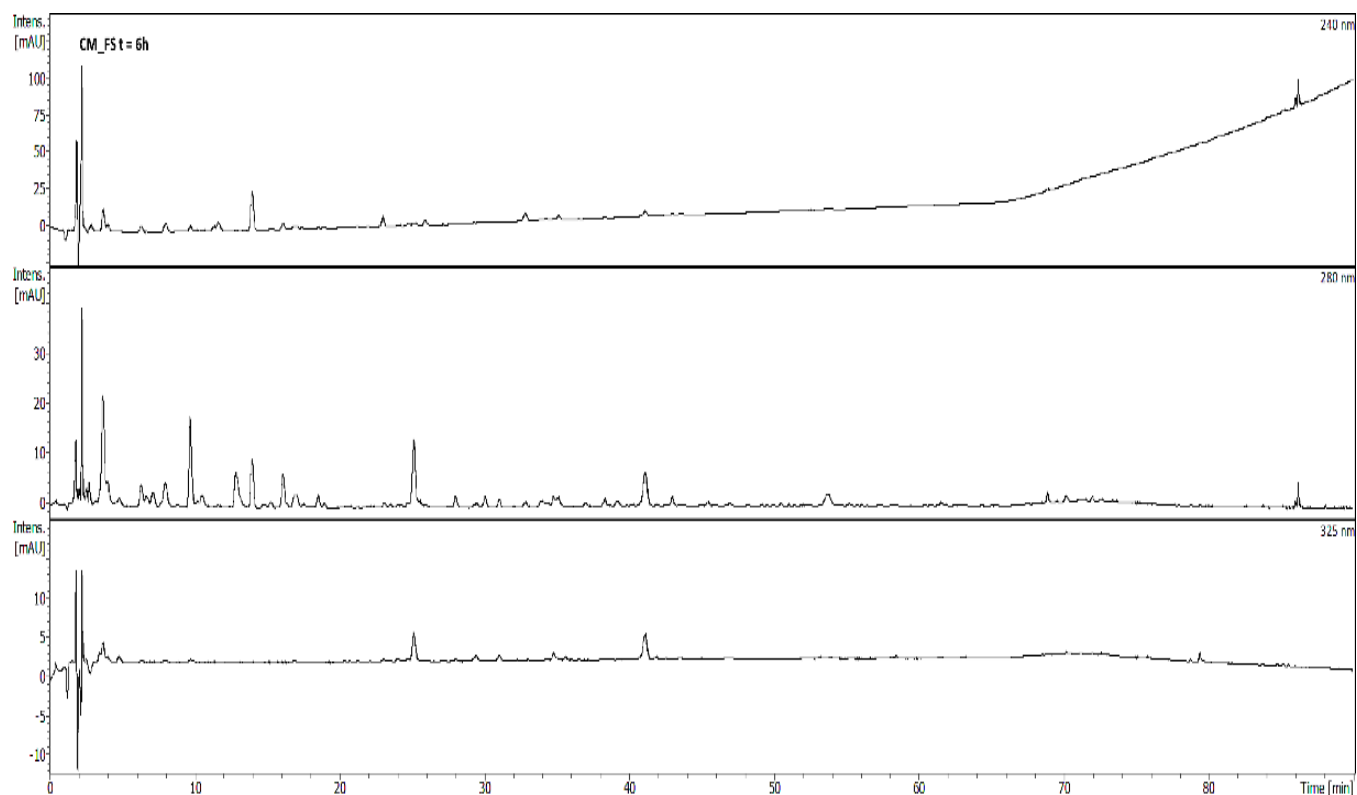

**Figure S4.** HPLC chromatograms of ethanolic-aqueous extract from fruits of *C. mas* treated with FS in  $t = 6$  h registered at 240, 280, and 325 nm.

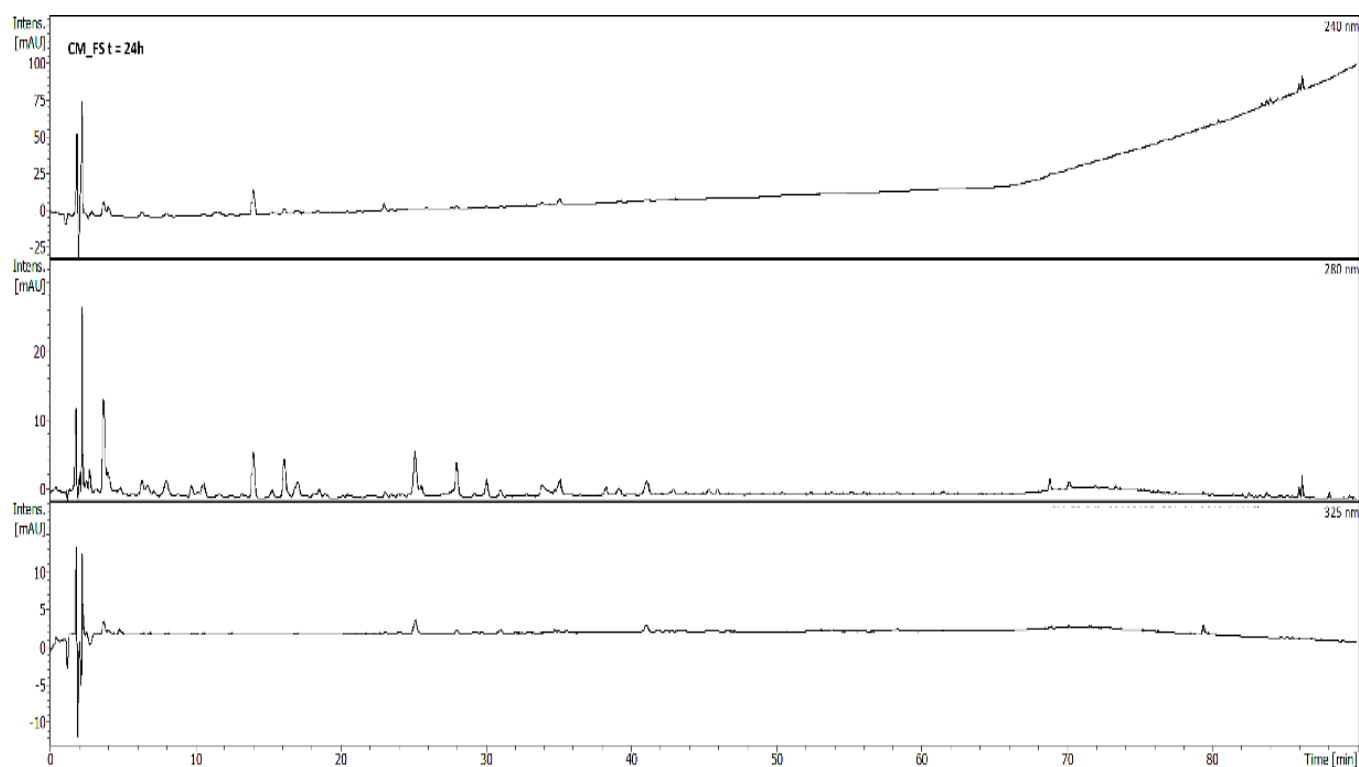

**Figure S5.** HPLC chromatograms of ethanolic-aqueous extract from fruits of *C. mas* treated with FS in  $t = 24$  h registered at 240, 280, and 325 nm.
